# Supplementary material for: Identification of Strain-Specific B-cell Epitopes in Trypanosoma cruzi Using Genome-Scale Epitope Prediction and High-Throughput Immunoscreening with Peptide Arrays
Source: PLoS Negl Trop Dis. 2013 Oct 31;7(10):e2524. doi: 10.1371/journal.pntd.0002524 (PMC3814679; doi:10.1371/journal.pntd.0002524)
Supplement: Table S3 — Reactivity of the sera from mice infected with different T. cruzi strains against the peptides. (XLSX) [file pntd.0002524.s007.xlsx]

## Sheet: Sheet1
Supplementary table S3 – Reactivity of peptides against sera of mice infected with different T. cruzi strains.
Membrane ID	Relative intensity			Gene ID	Peptide	Protein annotation
	Colombiana	Y	CL Brener
A1	1.08	1.21	1.55	Tc00.1047053506401.320	PAAKSAAKPAAKPA	60S ribosomal protein L7a, putative
A2	0.87	0.69	0.86	Tc00.1047053506949.30	MKGEEKGNTVVTTDGGKN	hypothetical protein, conserved
A3	1	2.95	1.39	Tc00.1047053507221.30	NGSGKGGTDREGDDDFN	hypothetical protein, conserved
A4	1.51	1.08	1.78	Tc00.1047053506573.50	FQDQQPDSPPPGEASAC	hypothetical protein, conserved
A5	0.12	0.68	0.34	Tc00.1047053506801.120	NMVPSPPSRAPGDDANTG	protein kinase, putative
A6	3.61	1.71	0.73	Tc00.1047053511837.129	ENSANPPPPDRSLPTP	RNA-binding protein, putative
A7	3.3	2.09	2.73	Tc00.1047053510857.40	FEGPSPGDPDKDF	RNA-editing complex protein, putative
A8	1.1	1.97	1.14	Tc00.1047053504069.40	HSTPPPSTPPLNE	hypothetical protein, conserved
A9	1.14	0.98	1.12	Tc00.1047053510149.80	LDKAPPPPPSGANAT	ABC transporter, putative
A10	1.1	1.1	2.23	Tc00.1047053506401.330	GDDNDDDDGEEGDNTAL	hypothetical protein, conserved
B1	1.44	0.921	1.26	Tc00.1047053508593.130	NQSDDDDDDDDDEDS	hypothetical protein, conserved
B2	1.39	4.26	1.77	Tc00.1047053511589.70	FFQPQPQPQPQPQPQQF	ADP-ribosylation factor GTPase activating protein, putative
B3	2.64	0.38	1.92	Tc00.1047053506251.40	ATAASGGGGGGGRNPSE	hypothetical protein
B4	0.68	2.89	1.87	Tc00.1047053508675.20	KVDDDDDDDKN	DNA excision repair protein, putative
B5	1	1.804	1.55	Tc00.1047053509979.51	MNVNDDDDDDGR	zinc carboxypeptidase, putative
B6	0.5	2.5	2.33	Tc00.1047053511041.20	FSDGAHGSGASRGSGR	hypothetical protein, conserved
B7	0.97	2.12	2.82	Tc00.1047053506661.120	KRRKRQQQQQQQ	hypothetical protein
B8	1.97	1.86	0.7	Tc00.1047053510089.50	HGINDAAPPPTGEPCTS	hypothetical protein, conserved
B9	0.78	1.3	3.43	Tc00.1047053510359.320	MDDDDDERTGGG	DNA-directed RNA polymerase III subunit, putative
B10	0.92	2.25	0.2	Tc00.1047053506859.150	VGAEGEGEKNDVPSEEQ	hypothetical protein
C1	0.69	0.97	1.4	Tc00.1047053506401.320	PIELVLWMPTLCRAN	60S ribosomal protein L7a, putative
C2	1.86	2.92	2.45	Tc00.1047053510307.284	AEPKSAEPKPAEPKS	trans-sialidase, putative
C3	1.07	1	1.07	Tc00.1047053508593.130	MDDDDDDDERTGGG	hypothetical protein, conserved
C4	0.73	1.97	1.49	Tc00.1047053506681.60	STQPEASQPQQQQESQNL	hypothetical protein, conserved
C5	0.47	0.9	1.43	Tc00.1047053510359.320	EEEDDDDVDGGEEKGV	DNA-directed RNA polymerase III subunit, putative
C6	2.59	2.31	2.7	Tc00.1047053510421.310	QRMSNASGGGGGGMRQNE	hypothetical protein, conserved
C7	1.34	0.97	2.11	Tc00.1047053511153.100	ARKNEDVNKADEEREEI	RNA-binding protein, putative
C8	0.29	0.88	0.48	Tc00.1047053506303.160	SLNGDGDSDSDSDSDAD	hypothetical protein
C9	1.94	1	1.34	Tc00.1047053511859.80	SSLRTGSNGSPNPTPSI	hypothetical protein
C10	1.18	1.02	1.58	Tc00.1047053506585.50	TTHSSRGPTSSHRTS	hypothetical protein, conserved
D1	1.67	2.15	2.09	Tc00.1047053506401.320	AAKTAAKPAAKSAAKPAAKP	60S ribosomal protein L7a, putative
D2	2.31	2.64	2.22	Tc00.1047053506825.30	PHAASPTGTGANRST	hypothetical protein, conserved
D3	1.19512	1.12195	0.926829	Tc00.1047053510307.284	AEPKSAEPKPAEPKS	trans-sialidase, Group IV, putative
D4	1.14	1.7	1.7	Tc00.1047053510307.284	PKPAEPNSAEPKPAE	trans-sialidase, Group IV, putative
D5	1.23	2.83	1.23	Tc00.1047053508831.140	PSPFGIAAAGDKPSPFGQA	surface antigen 2 (CA-2), putative
D6	1.51351	1.97297	1.16216	Tc00.1047053508831.140	PPPFGQAAEGDKPPP	surface antigen 2 (CA-2), putative
D7	1.88	0.86	0.98	Tc00.1047053506401.320	PIELVLWMPTLCRAN	60S ribosomal protein L7a, putative
D8	1.12766	0.829787	0.659574	Tc00.1047053509551.130	EKKGGGNGPTPDGDE	hypothetical protein, conserved
D9	1	0.975	1.725	Tc00.1047053507669.70	TSAGPPDATGGQQPG	dynein intermediate chain, putative
D10	1.62963	1.77778	1.18519	Tc00.1047053506181.120	PGSPSESRGPGTGDS	hypothetical protein, conserved
E1	1.10811	0.918919	1.7027	Tc00.1047053506529.120	TPPPQSNTEDDTDEE	hypothetical protein
E2	2.13	3	2.21	Tc00.1047053458015.10	QKQPDPHEKSPEEKS	hypothetical protein, conserved
E3	1.45946	1.05405	1.59459	Tc00.1047053506949.30	DTPQTPGTTSTGSSG	hypothetical protein, conserved
E4	0.866667	1.04444	1.06667	Tc00.1047053508211.50	PHEEEGEPSEEANSP	hypothetical protein, conserved
E5	0.774194	0.758065	0.709677	Tc00.1047053507669.80	PRGREEQPPQEGQQR	protein phosphotase, putative
E6	0.477273	0.920455	0.5	Tc00.1047053507711.170	DGVQPPPTSSSSSND	hypothetical protein, conserved
E7	1.35897	0.974359	0.923077	Tc00.1047053504033.200	DRSPSPRQPQSSEST	hypothetical protein
E8	1.475	1.3	1.35	Tc00.1047053507711.120	EDEKNDDDNKDGGED	hypothetical protein, conserved
E9	1.09302	1.13953	0.953488	Tc00.1047053503897.20	DEEYDGEGDGDEPPR	hypothetical protein, conserved
E10	1.36111	1.16667	1.52778	Tc00.1047053507625.110	EGEEGNDSKDGSAPE	chaperone DNAJ protein, putative
F1	1.23256	1.60465	1.06977	Tc00.1047053507611.310	ESEEDGGDEGQGEEE	eukaryotic translation initiation factor 3 subunit 8, putative
F2	1.4	1.02222	0.955556	Tc00.1047053511529.150	PPGPTGRSAGNNPPK	hypothetical protein, conserved
F3	1.16327	0.938776	0.857143	Tc00.1047053506135.20	GRPSTGPHGDGPPPV	hypothetical protein, conserved
F4	1.37	2.63	1.03	Tc00.1047053508387.160	VPPEPEEKDKKPKDA	hypothetical protein, conserved
F5	1.10417	0.8125	0.854167	Tc00.1047053510351.50	GKKKGQSSPDGSEPR	hypothetical protein, conserved
F6	1.04444	0.8	0.711111	Tc00.1047053504247.20	GDKGQQDSDEENDDP	ATP-dependent RNA helicase, putative
F7	1.8125	1.15625	1.71875	Tc00.1047053511423.50	RTSAPPPSTSPSYDG	hypothetical protein, conserved
F8	1.19048	0.833333	0.857143	Tc00.1047053503897.20	EEEEEDEEQKAGNGE	hypothetical protein, conserved
F9	1.02	2.05	1.96	Tc00.1047053511529.150	KENEEGASGPDDSAG	hypothetical protein, conserved
F10	2.24	1.79	1.26	Tc00.1047053506531.40	GGSNEEKDPGETPAC	hypothetical protein, conserved
G1	0.774194	0.822581	0.854839	Tc00.1047053503833.20	RNGPKPTQGNNKSPR	hypothetical protein, conserved
G2	1	0.703704	0.592593	Tc00.1047053506941.260	MQKPPPADPSWSDEE	hypothetical protein, conserved
G3	1.13953	0.953488	0.860465	Tc00.1047053511577.30	VARPPDEKPAPDDSE	hypothetical protein, conserved
G4	0.353846	0.4	0.284615	Tc00.1047053510719.130	RVFPGEPDPDNFAPP	hypothetical protein, conserved
G5	1.15385	0.846154	1.30769	Tc00.1047053503641.10	PPQQGKNSTGSGSSA	hypothetical protein, conserved
G6	2.09	1.6	0.93	Tc00.1047053503813.10	SPSESKTTPGQPSLE	hypothetical protein, conserved
G7	1.14634	0.878049	0.97561	Tc00.1047053506529.170	ANEKGGDEEGDTDRK	hypothetical protein, conserved
G8	1.08696	1	1.23913	Tc00.1047053511037.40	APENGDEKDSDKNET	hypothetical protein, conserved
G9	1.59375	1.46875	1.875	Tc00.1047053507739.80	EKSPPNTSVTEETNP	hypothetical protein, conserved
G10	1.29268	1.65854	1.34146	Tc00.1047053506517.30	RTPQREGSPSRPPSS	hypothetical protein
H1	1.59459	1.43243	1.62162	Tc00.1047053506401.90	QSTPPGTASQPRGAG	centrin, putative,caltractin, putative
H2	2	1.02	0.96	Tc00.1047053506825.150	VGEPSNNGTPDEERE	hypothetical protein, conserved
H3	1.10204	0.816327	0.693878	Tc00.1047053506357.29	DDPDSADPEEAEKAS	dynein light chain, putative
H4	1.725	0.75	0.9	Tc00.1047053506867.10	EKEEAGENEEEGPNG	endonuclease G, putative
H5	1.35714	0.833333	0.785714	Tc00.1047053503905.30	DAPVQKPAQKAKASP	hypothetical protein, conserved
H6	1.7	1.46667	1.46667	Tc00.1047053508987.30	PHPVGDATRARGTTA	protein kinase, putative
H7	2.1	1.48	1.3	Tc00.1047053508539.50	EANGSCSDYAQSADD	hypothetical protein, conserved
H8	1.21154	0.865385	0.807692	Tc00.1047053506247.420	SEDNTNKNTSPFSKC	hypothetical protein, conserved
H9	1.60526	0.842105	1.34211	Tc00.1047053504035.140	SPSPGVEPPGDGRGE	mismatch repair protein MLH1, putative
H10	1.33333	0.933333	0.888889	Tc00.1047053505807.260	QGADLSNRSPSSAAQ	hypothetical protein, conserved
I1	1.18605	1.2093	0.883721	Tc00.1047053507639.90	PVPADEPFSSQQHKQ	hypothetical protein, conserved
I2	1.18919	1.13514	0.945946	Tc00.1047053503557.30	SEGGHDDALPGQHED	hypothetical protein, conserved
I3	0.9	0.9	0.966667	Tc00.1047053510309.70	QDDRPFPDECGDADT	hypothetical protein, conserved
I4	1.25641	1.5641	0.871795	Tc00.1047053510101.400	ASEHPTEVGAEKGET	hypothetical protein, conserved
I5	1.06522	1	0.804348	Tc00.1047053510595.40	QSSPEPLSSDDGVGG	hypothetical protein, conserved
I6	1.35135	1.05405	0.945946	Tc00.1047053445553.10	PTTTSQPSAERKEMV	hypothetical protein, conserved
I7	1.30769	1.46154	1.69231	Tc00.1047053511621.170	QKMAPPPHEKKKKKK	hypothetical protein, conserved
I8	1.48649	1.32432	1.16216	Tc00.1047053507009.70	SHNEDAPSQNDVETN	hypothetical protein, conserved
I9	0.912281	0.877193	0.701754	Tc00.1047053504097.30	ALDRASNTPAGSTAT	hypothetical protein, conserved
I10	1.30556	1.63889	2.22222	Tc00.1047053506825.30	PHAASPTGTGANRST	hypothetical protein, conserved
J1	1.15152	1.33333	1.12121	Tc00.1047053510613.30	TKTSSTPTRKTEPAV	hypothetical protein
J2	1.1	2.47	2.9	Tc00.1047053505807.120	SLSSSPSPLEPKKPR	lysyl-tRNA synthetase, putative
J3	0.921569	0.627451	0.941176	Tc00.1047053507009.70	FLPREPPQEPSLADT	hypothetical protein, conserved
J4	1.15217	1.08696	1.15217	Tc00.1047053511559.50	SSSSPSTSNPSAVVA	hypothetical protein, conserved
J5	1.20455	1.54545	0.886364	Tc00.1047053507807.40	DIRATGDDGQSTTKH	hypothetical protein, conserved
J6	1.17391	1.47826	1.78261	Tc00.1047053508387.30	PLRRPSSRQQRGTGG	hypothetical protein, conserved
J7	1.2439	0.95122	1.04878	Tc00.1047053506605.10	TGGETPTEMAKDPTA	hypothetical protein, conserved
J8	1.04878	0.878049	1.19512	Tc00.1047053510149.70	EDIPSPPGGGGGNTK	hypothetical protein, conserved
J9	1.06977	1.62791	1.7907	Tc00.1047053511133.10	TTNTTTSNSTTNTTA	hypothetical protein, conserved
J10	1.30556	1.02778	1.05556	Tc00.1047053503853.10	TPNDTANETTNELED	hypothetical protein, conserved
K1	0.933333	1.84444	0.622222	Tc00.1047053508211.30	HQKEEEYEKKEGDRN	sphingosine kinase A, B, putative
K2	2.02	0.81	1.08	Tc00.1047053504431.10	SDRDRDQRSREGPEE	hypothetical protein, conserved
K3	1.14286	0.77551	0.959184	Tc00.1047053507809.80	FGNNPSSSPGSASSR	hypothetical protein, conserved
K4	1.07143	0.880952	1	Tc00.1047053505807.120	RAPRKKPDLPGAYSS	lysyl-tRNA synthetase, putative
K5	1.07018	0.649123	0.614035	Tc00.1047053511555.90	KTTGDGGGGCEEEVE	acyl-CoA binding protein, putative
K6	1.30952	1.02381	1.64286	Tc00.1047053507047.100	CAGEEEEEESPVSHI	hypothetical protein, conserved
K7	0.873016	0.650794	0.825397	Tc00.1047053503477.10	EKNDGVQKSGEVPPN	hypothetical protein, conserved
K8	0.865385	0.865385	0.711538	Tc00.1047053506265.190	SNDNGPPHLTESPHC	hypothetical protein, conserved
K9	1.925	1.05	0.95	Tc00.1047053510143.24	GFPGDAGGFPGGAGG	Hsc70-interacting protein (Hip), putative
K10	1.58824	1.32353	1.29412	Tc00.1047053509151.140	KKTAAPKKAAAPQKA	60S ribosomal protein L23a, putative
L1	1.37838	1	1.18919	Tc00.1047053511711.110	KTKQKKKKKTKTKTK	hypothetical protein, conserved
L2	0.954545	0.977273	0.75	Tc00.1047053510173.120	HPTATTTKTAAAAAE	hypothetical protein, conserved
L3	1	1.25581	0.930233	Tc00.1047053509793.20	SKPENTAAADPAPPS	hypothetical protein, conserved
L4	2.14	1.46	1.36	Tc00.1047053511907.190	PADPGGEDATDSSFR	hypothetical protein
L5	1.14286	0.693878	0.938776	Tc00.1047053508857.90	SVKQRQASPPPASTS	hypothetical protein, conserved
L6	1.02083	0.75	1	Tc00.1047053503583.70	SSSSPPPPPGDISAL	hypothetical protein, conserved
L7	1.46774	0.564516	0.822581	Tc00.1047053506727.60	NLQHTPRAPTPPRNC	hypothetical protein, conserved
L8	2.5	0.95	0.88	Tc00.1047053508857.90	PAGKTHTAERGEEKT	hypothetical protein, conserved
L9	1.07692	1.23077	1.17949	Tc00.1047053509637.27	RKRDRHEESAESDQK	hypothetical protein, conserved
L10	1	1.40476	1.38095	Tc00.1047053506989.130	GDDTHNVRDRDGGRE	hypothetical protein, conserved
M1	1.29167	0.854167	0.895833	Tc00.1047053506789.249	HNGGEWPREPKQEEQ	hypothetical protein, conserved
M2	1.47368	0.894737	1.42105	Tc00.1047053511459.20	QKENNNNNKKKTTGI	hypothetical protein, conserved
M3	3.35	2.21	1.26	Tc00.1047053511859.50	SRGESGGVAPSDGVA	hypothetical protein, conserved
M4	1.07143	0.928571	0.952381	Tc00.1047053507991.110	AAAATSDPKPLPGNK	hypothetical protein, conserved
M5	1.35088	0.526316	0.77193	Tc00.1047053509937.20	EKKSKVEKSEKEGRA	hypothetical protein, conserved
M6	0.94	0.68	0.92	Tc00.1047053508153.740	RNGSRSHDEPEPAGR	hypothetical protein
M7	1.88571	1.05714	1.11429	Tc00.1047053506821.170	PRSTTPQPAEPEASN	aquaporin-like protein, putative
M8	1.29412	1.44118	1.82353	Tc00.1047053503539.20	GPSSRAGDPPRPQAA	hypothetical protein, conserved
M9	1	0.878049	0.95122	Tc00.1047053508909.160	EKSSPLLPSSPSANA	hypothetical protein, conserved
M10	1.52	2	1.64	Tc00.1047053509937.220	STGDAPQGAPSAPPM	protein kinase, putative
N1	1.59459	1.05405	1.16216	Tc00.1047053503823.60	KRNTSNDDSSMRGDT	hypothetical protein, conserved
N2	0.890625	1.20312	0.625	Tc00.1047053503843.20	AASVSSSTPSPLSSS	hypothetical protein, conserved
N3	1.32	0.93	2.64	Tc00.1047053503939.70	KRTTSPQISPEKSAS	hypothetical protein
N4	2.41	1.26	1.67	Tc00.1047053506145.10	QNRDSGVLEGPTATT	protein kinase, putative
N5	1.53	3.23	1.07	Tc00.1047053506195.140	ERTSSTEGSQPHLPG	hypothetical protein, conserved
N6	1.28	2.86	1.03	Tc00.1047053506789.190	TESTTSRKEGGREGA	hypothetical protein, conserved
N7	1.83721	0.744186	0.883721	Tc00.1047053508153.300	GTPRTEGPNGEKNQQ	hypothetical protein, conserved
N8	1.17073	1.04878	0.97561	Tc00.1047053510219.10	GAAPLPREGGQPQRS	hypothetical protein, conserved
N9	1.4359	0.974359	1.02564	Tc00.1047053511291.40	EANVKDDSDDAKGGE	protein kinase, putative
N10	1.30769	1.41026	1.69231	Tc00.1047053511815.160	EGGKDGPTSTSNPPA	hypothetical protein, conserved
O1	1.29412	1.17647	0.970588	Tc00.1047053506303.150	PSLSIPPPAVASPPA	hypothetical protein, conserved
O2	1.275	1.1	1.05	Tc00.1047053506509.50	GSAKTVGPKDDPKVM	hypothetical protein, conserved
O3	1.8	2.03	1.5	Tc00.1047053506725.30	AGGTSAGPAAGNSTQ	hypothetical protein, conserved
O4	1.37	1.63	1.03	Tc00.1047053507889.20	KGGTTKSAVGTPFSS	hypothetical protein, conserved
O5	1.48485	1.27273	1.09091	Tc00.1047053508175.20	EHETQPPRERSTKLV	hypothetical protein, conserved
O6	1.13	1.97	1.21	Tc00.1047053508919.100	ALAEPDPGGERNASD	hypothetical protein, conserved
O7	1.54	1	0.9	Tc00.1047053509799.130	PAPAPSPASGTSRKP	hypothetical protein, conserved
O8	2.07	1.37	1.61	Tc00.1047053511287.130	VSRRVSGDGDDGGVG	hypothetical protein, conserved
O9	1.94	1.34	1	Tc00.1047053511661.120	GGEGRGGQKDERDGN	protein kinase, putative
O10	1.77	0.95	1.67	Tc00.1047053511907.220	NSNNTNNDNDSDDYA	hypothetical protein, conserved
